# Supplementary material for: Spatial Mapping of Riverbed Grain-Size Distribution Using Machine Learning
Source: Frontiers journal article supplement (doi:10.3389/frwa.2020.551627), 2020-11-23
Supplement: Table_1.DOCX [file Table_1.DOCX]

Table 1. Substrate size classification.

| Reach-dominant substrate size class | Reach-dominant substrate Size (mm) | Particle classification | Particle diameter (mm) | Lumped particle classification | Particle diameter of the lumped class (mm) |
| --- | --- | --- | --- | --- | --- |
| 1 | 0.033 | Coarse silt | 0.031 – 0.0625 | silt | 0.0078 – 0.0625 |
| 2 | 0.1 | Very fine sand | 0.0625 – 0.125 | sand | 0.0625-2 |
| 3 | 1.031 | Very coarse sand | 1-2 | sand | 0.0625-2 |
| 4 | 15.85 | Medium gravel | 8 – 16 | gravel | 2-64 |
| 5 | 33 | Very coarse gravel | 32 – 64 | gravel | 2-64 |
| 6 | 38.1 | Very coarse gravel | 32 – 64 | gravel | 2-64 |
| 7 | 63.55 | Very coarse gravel | 32 – 64 | gravel | 2-64 |
| 8 | 114.15 | Fine cobble | 64 – 128 | cobble | >64 |
| 9 | 157 | Coarse cobble | 128 – 256 | cobble | >64 |
| 10 | 201 | Coarse cobble | 128 – 256 | cobble | >64 |
| 11 | 380.5 | Very coarse cobble | >256 | cobble | >64 |
| 12 | 609.6 | Very coarse cobble | >256 | cobble | >64 |
